# Supplementary material
Source: Springer Nature journal article supplement (https://www.springermedizin.de/resource/supplementary/12889_2010_3125_MOESM2_ESM.pdf/9488100)
Supplement: MOESM2 [file 9488100]

Medical history and explanation of the medical procedures (n=1167)

Physical examination with skin inspection (n = 1167)

Anthropometric data and first blood pressure measurement (n = 1167)

Blood sample (n = 1125)

Patch Test (n = 288)

Skin Prick Test (n = 1138)

Measurement of exhaled nitric oxide (FeNO) (n = 1156)

Spirometry (n = 1164)

Examination of bronchial hyperresponsiveness (n = 423)\*

Second blood pressure measurement (n = 1167)

Final discussion with the study physician
